# Supplementary material for: Noninvasive Assessment of an Engineered Bioactive Graft in Myocardial Infarction: Impact on Cardiac Function and Scar Healing
Source: PubMed Central journal article supplement (PMC5442807; doi:10.5966/sctm.2016-0063), 2016-09-02
Supplement: SCT3-6-647-s001.pdf [file SCT3-6-647-s001.pdf]

**Supplemental Information - Gálvez-Montón et al.**

**Table S1. MRI data analysis.** LVEF=Left Ventricular Ejection Fraction; CO=Cardiac Output; SV=Stroke Volume; EDV=End Diastolic Volume; ESV=End Systolic Volume; EDWM=End Diastolic Wall Mass.

|             | Baseline |              | 48 hours post-MI |              | 1 month post-MI |              |
|-------------|----------|--------------|------------------|--------------|-----------------|--------------|
|             | Control  | EBIG-Treated | Control          | EBIG-Treated | Control         | EBIG-Treated |
| <b>LVEF</b> | 56.5±2.8 | 55.8±2.3     | 52.8±1.6         | 53.2±1.9     | 57.9±1.7        | 63.3±2.9     |
| <b>CO</b>   | 2.2±0.1  | 2.1±0.1      | 2±0.1            | 1.8±0.1      | 2.4±0.1         | 2.6±0.2      |
| <b>SV</b>   | 25.1±1.3 | 24.1±1.6     | 24.1±1.3         | 24.6±1.5     | 28.2±1.3        | 35.6±3.1     |
| <b>EDV</b>  | 44.7±1.8 | 43.8±3.2     | 45.6±1.8         | 46.7±3.2     | 48.9±2.5        | 56.3±4.5     |
| <b>ESV</b>  | 19.6±1.6 | 19.7±2.1     | 21.5±1           | 22.2±2.1     | 20.7±1.6        | 20.7±2.3     |
| <b>EDWM</b> | 44.1±1.6 | 42.9±2.2     | 50.4±2.2         | 50.4±1.2     | 53±1            | 53.2±1.6     |

## FIGURE LEGENDS

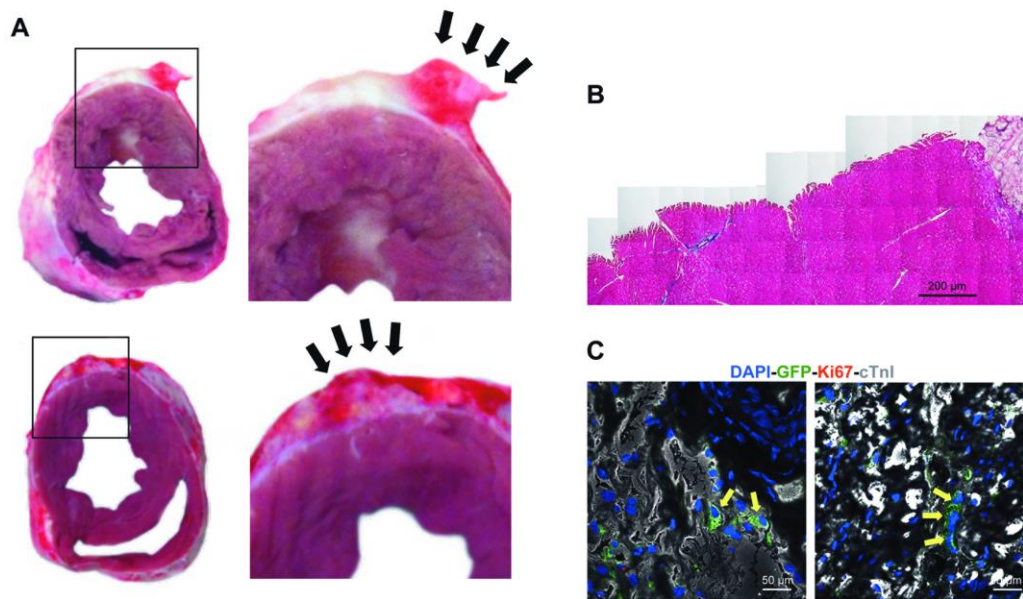

**Figure S1. Myocardial analyses of sham animals.** (A) Representative heart sections from two sham animals showing the myocardium and the EBIG after 30 days of follow-up. At the left the corresponding zoom images exhibiting in detail the EBIG (arrows). (B) Masson's trichrome staining composition screening demonstrated the EBIG adhesion and the healthy adjacent myocardium of a sham animal (scale bar = 200  $\mu\text{m}$ ). (C) Immunostaining against GFP (green), Ki67 (red), and cTnI (white) antibodies showing the migration of GFP-pATPCs into the healthy myocardium 30 days post-EBIG implantation. Nuclei are counterstained with DAPI (blue) (scale bars = 50  $\mu\text{m}$ ).

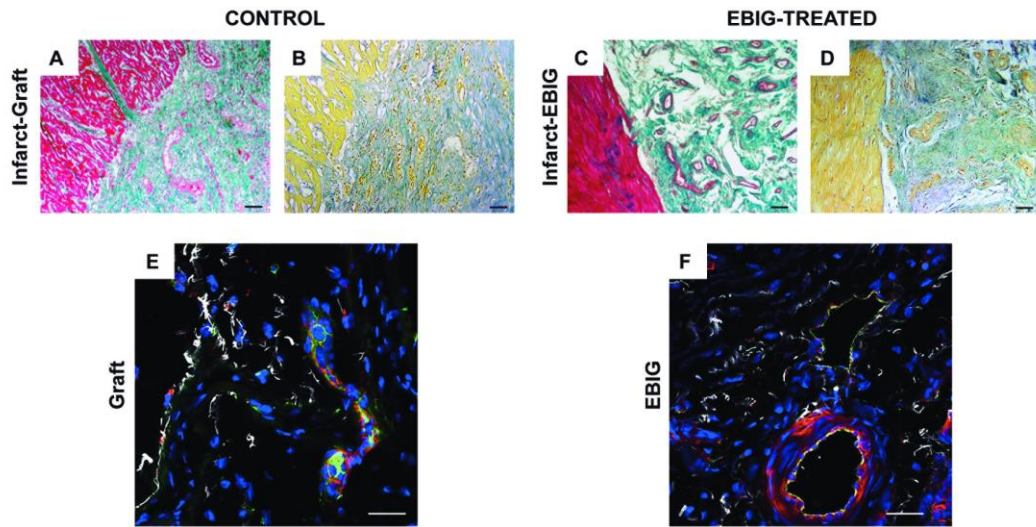

**Figure S2.** Histological analysis and newly formed vessels in the graft. (**A-D**). Histological analysis after light green Masson's and Gallego's modified trichrome staining showing the myocardium-scaffold interface. (**F and G**) Images of scaffolds labeled with elastin (white) after 30 days of implantation of an animal in the control group (**E**) and a treated (**F**) animal with newly formed vessels positive for isolectin B4 (green) and SMA (red). Nuclei are counterstained with DAPI (blue) (scale bar = 50  $\mu$ m).

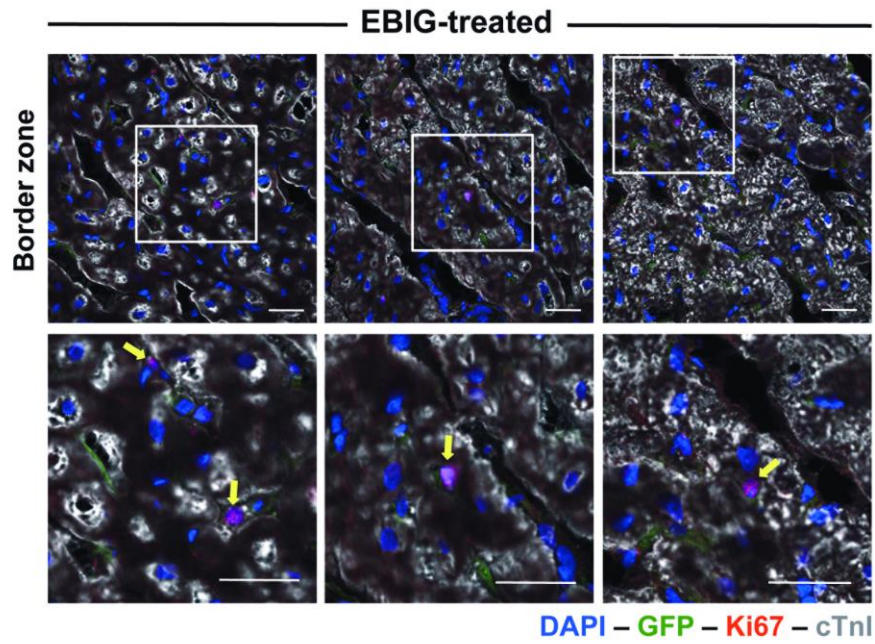

**Figure S3. Cardiomyocyte proliferation.** Immunohistochemistry images from border zones of EBIG-treated animals against GFP (green), Ki67 (red), and cTnI (white) antibodies showing host proliferating cardiomyocytes (yellow arrows). Nuclei are counterstained with DAPI (blue) (scale bars=50  $\mu$ m).
